# Supplementary material
Source: Preprints.org preprint supplement (doi:10.20944/preprints202106.0351.v1)
Supplement: Supplementary file 1 [file supplementary]

## Sheet: Table 1
								Antimicrobial resistance phenotype (mg/L)							Antimicrobial resistance genotype	Incompatibility types
Strain	Species	ST	Patient	Source	Date	Lab	MDR	CAZ	CIP	GEN	IPM	MEM	TZP	SXT
PBIO2726	C. freundii	396	1	rectal swab	2020-06-21	MVZ	yes	>64 (R)	4 (R)	4 (R)	>16 (R)	>16 (R)	>128 (R)	>320 (R)	aac(6')-Ib-G, aadA1, blaCMY-78, blaVIM-1, dfrA14, fosA7.2, qnrS1, sul1, sul2, tet(34)	IncN (ST7), IncFII(S), IncFII(SARC14)
PBIO2728	E. coli	10	2	rectal swab	2020-07-26	MVZ	yes	>64 (R)	0.5 (I)	4 (R)	>16 (R)	>16 (R)	>128 (R)	>320 (R)	aac(6')-Ib-G, aadA1, blaVIM-1, dfrA14, qnrS1, sul1, tet(34)	IncN (ST7), IncFIA(HI1), IncFIB(K), IncFII(p96A), IncFII
PBIO2729	K. oxytoca	168	2	rectal swab	2020-07-26	MVZ	yes	>64 (R)	2 (R)	8 (R)	>16 (R)	>16 (R)	>128 (R)	>320 (R)	aac(6')-Ib-G, aadA1, blaOXY-6-1, blaVIM-1, dfrA14, fosA_gen, oqxA10, oqxB20, qnrS1, sul1, tet(34)	IncN (ST7), IncFIB(K)
PBIO2730	K. oxytoca	172	3	sternal wound	2020-08-05	IMD	yes	>64 (R)	4 (R)	2 (R)	>16 (R)	>16 (R)	>128 (R)	>320 (R)	aac(6')-Ib-G, aph(3'')-Ib, aph(6)-Id, blaOXA-10, blaOXY-6-2, blaVIM-1, catA1, cmlA5, dfrA14, fosA_gen, mcr-9.1, oqxA10, oqxB20, qnrS1, sul1, tet(34)	IncHI2, IncHI2A, IncFII(pCRY)
